# Supplementary material for: Altered Hematopoiesis in Mice Lacking DNA Polymerase μ Is Due to Inefficient Double-Strand Break Repair
Source: PLOS journal article supplement (doi:10.1371/journal.pgen.1000389), 2009-02-19
Supplement: S6 (10.1371/journal.pgen.1000389.s006) [file journal.pgen.1000389.s006]

| <b>GATE</b>               | <b>Lin<sup>-</sup></b> | <b>LSK</b> | <b>Lin<sup>-</sup>IL7R<sup>+</sup></b> | <b>Lin<sup>-</sup>Sca1<sup>-</sup>c-kit<sup>+</sup></b> |            |            |
|---------------------------|------------------------|------------|----------------------------------------|---------------------------------------------------------|------------|------------|
| <i>% of</i>               | <i>LSK cells</i>       | <i>HSC</i> | <i>CLP</i>                             | <i>CMP</i>                                              | <i>GMP</i> | <i>MEP</i> |
| <b>WT</b>                 | 4.03±0.48              | 55.20±1.52 | 2.68±0.25                              | 17.32±1.61                                              | 43.87±2.9  | 14.6±1.2   |
| <b>Polμ<sup>-/-</sup></b> | 5.35±0.71              | 48.37±2.44 | 3.76±0.46                              | 17.26±1.48                                              | 47.75±2.24 | 13.15±0.79 |

**Table S1. Frequency of hematopoietic progenitor and stem cells in Polμ<sup>-/-</sup> bone marrow.** The table shows the percentage (frequency) of each population analyzed (+/- SEM) and the gate used for analysis.
